# Supplementary material for: Envisioning Zero Suicide
Source: Atypon-hosted journal article supplement (doi:10.1176/appi.ps.201500334), 2016-03-01
Supplement: appi.ps.201500334.ds001.pdf [file appi.ps.201500334.ds001.pdf]

## **GAP Committee on Psychopathology**

David A. Adler, M.D. (Chair)  
Jeffrey L. Berlant, M.D., Ph.D.  
Lisa B. Dixon, M.D., M.P.H.  
Matthew D. Erlich, M.D.  
Michael B. First, M.D.  
Beth Goldman, M.D., M.P.H.  
Steve Koh, M.D., M.P.H.  
Bruce M. Levine, M.D.  
David W. Oslin, M.D.  
Chaitanya Pabbati, M.D.  
Samuel G. Siris, M.D.
